# Supplementary material
Source: Springer Nature journal article supplement (https://www.springermedizin.de/resource/supplementary/13054_2012_667_MOESM8_ESM.pdf/9708950)

Sensitivity

SROC Curve

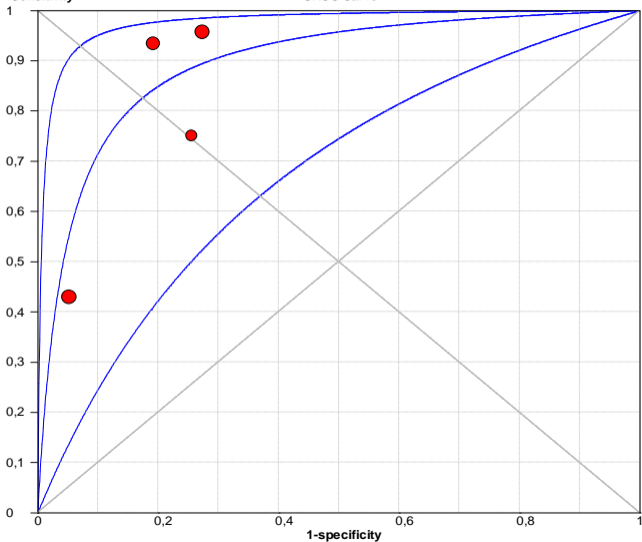

**Symmetric SROC**

AUC = 0,8952

SE(AUC) = 0,0324

$Q^* = 0,8262$

SE( $Q^*$ ) = 0,0341

Supplement: MOESM8 [file 9708950]
